# Supplementary material for: Dynamics of mussel plaque detachment
Source: Royal Society of Chemistry journal article supplement (doi:10.1039/c5sm01072a), 2015-01-01
Supplement: c5sm01072a1.pdf [file c5sm01072a1.pdf]

## SUPPLEMENTAL MATERIALS

### Dynamics of Mussel Plaque Detachment

Kenneth W. Desmond, Nicholas A. Zacchia, J. Herbert Waite, Megan T. Valentine

#### Tensile Testing Machine

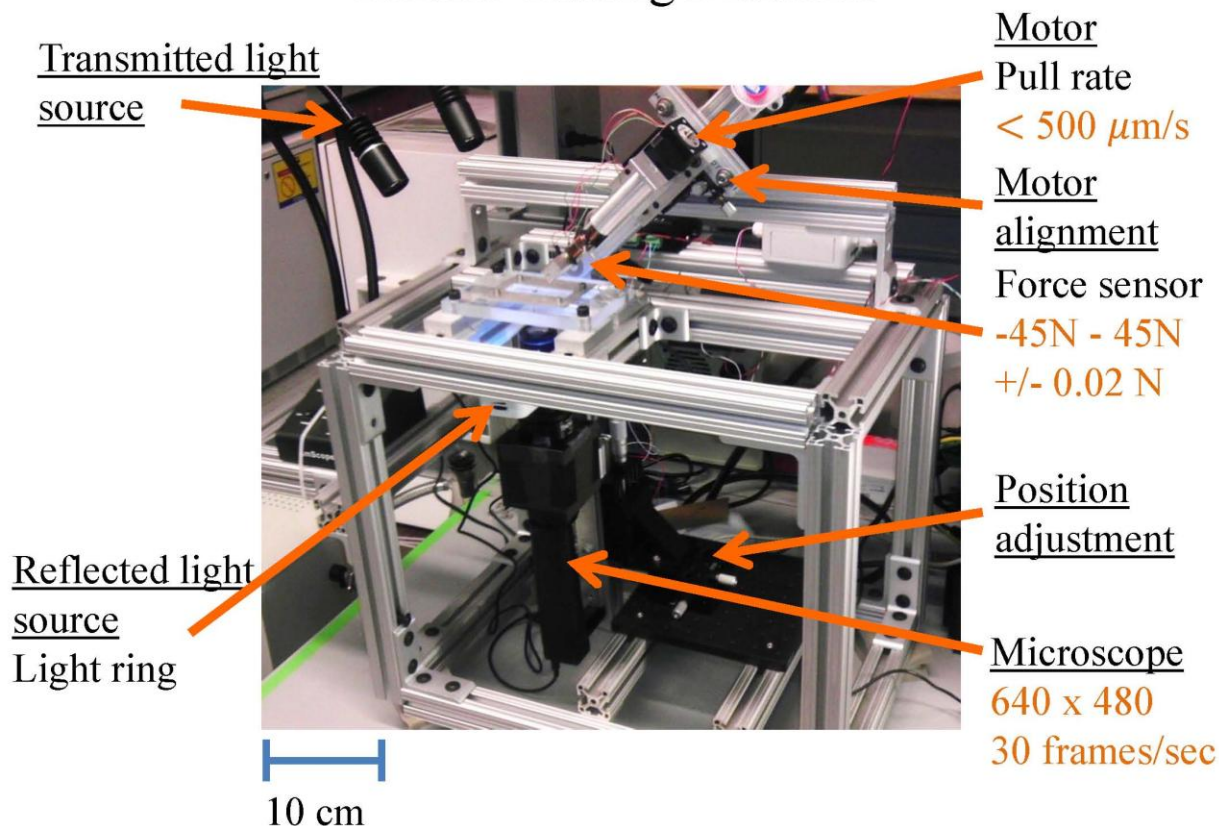

**Figure S1: Photograph of custom-built loading frame, with technical specifications.** The reflected light source was not used in this study. The motor alignment system allows rotation of the loading axis from  $\sim 20^\circ$  to  $\sim 160^\circ$ . The part numbers and vendors of all major equipment are given in the main manuscript. All other pieces were obtained from Thorlabs, McMaster Carr, or, in the case of some adapter plates and mounts, were machined in-house. A close-up of the sample chamber and motor clamp are given in Figure S2.

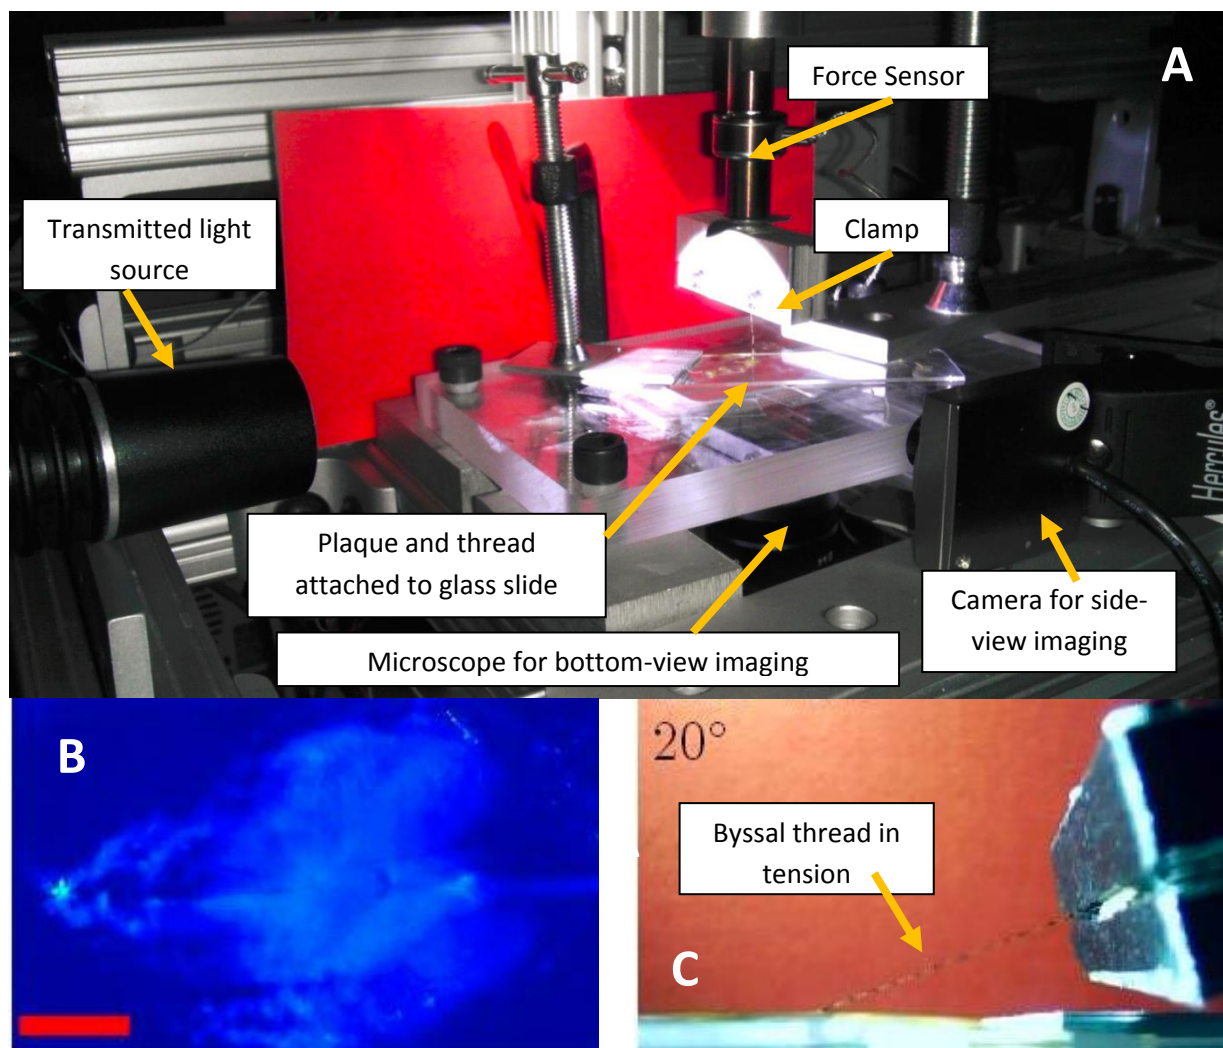

**Figure S2: Photographs of experimental setup and samples.** (A) A close-up of the force sensor, imaging system and clamp with sample loaded. Here, loading axis is in the 90° position. Full instrument is shown in Figure S1. (B) Bottom-view of plaque at the glass surface. Scale bar is 1 mm. (C) Side-view of plaque and thread system, pulled in tension at ~20°. Small fiducial markers were painted onto the thread to promote visualization. Thread length is ~ 20 mm.
